# Supplementary material for: [(CH3)2NH(CH2)2NH(CH3)2][(UO2)2F2(HPO4)2]: a new organically templated layered uranium phosphate fluoride - synthesis, structure, characterization, and ion-exchange reactions
Source: Royal Society of Chemistry journal article supplement (doi:10.1039/b705759h), 2007-01-01
Supplement: b705759h.pdf [file b705759h.pdf]

Electronic Supplementary Information (ESI) for:

**$[(\text{CH}_3)_2\text{NH}(\text{CH}_2)_2\text{NH}(\text{CH}_3)_2][(\text{UO}_2)_2\text{F}_2(\text{HPO}_4)_2]$ : A new organically  
templated layered uranium phosphate fluoride – Synthesis, structure,  
characterization, and ion-exchange reactions**

Kang Min Ok, Michael B. Doran, and Dermot O'Hare\*

Chemistry Research Laboratory, University of Oxford, Oxford, OX1 3TA, UK

- S1. Experimental and calculated powder X-ray diffraction patterns for  $[(\text{CH}_3)_2\text{NH}(\text{CH}_2)_2\text{NH}(\text{CH}_3)_2][(\text{UO}_2)_2\text{F}_2(\text{HPO}_4)_2]$
- S2. Thermogravimetric analysis diagram and powder X-ray diffraction patterns at various temperatures for  $[(\text{CH}_3)_2\text{NH}(\text{CH}_2)_2\text{NH}(\text{CH}_3)_2][\text{UO}_2\text{F}(\text{PO}_4)]$
- S3. IR and Raman vibrations ( $\text{cm}^{-1}$ ) for  $[(\text{CH}_3)_2\text{NH}(\text{CH}_2)_2\text{NH}(\text{CH}_3)_2][(\text{UO}_2)_2\text{F}_2(\text{HPO}_4)_2]$

S1. Experimental and calculated powder X-ray diffraction patterns for  $[(\text{CH}_3)_2\text{NH}(\text{CH}_2)_2\text{NH}(\text{CH}_3)_2][(\text{UO}_2)_2\text{F}_2(\text{HPO}_4)_2]$

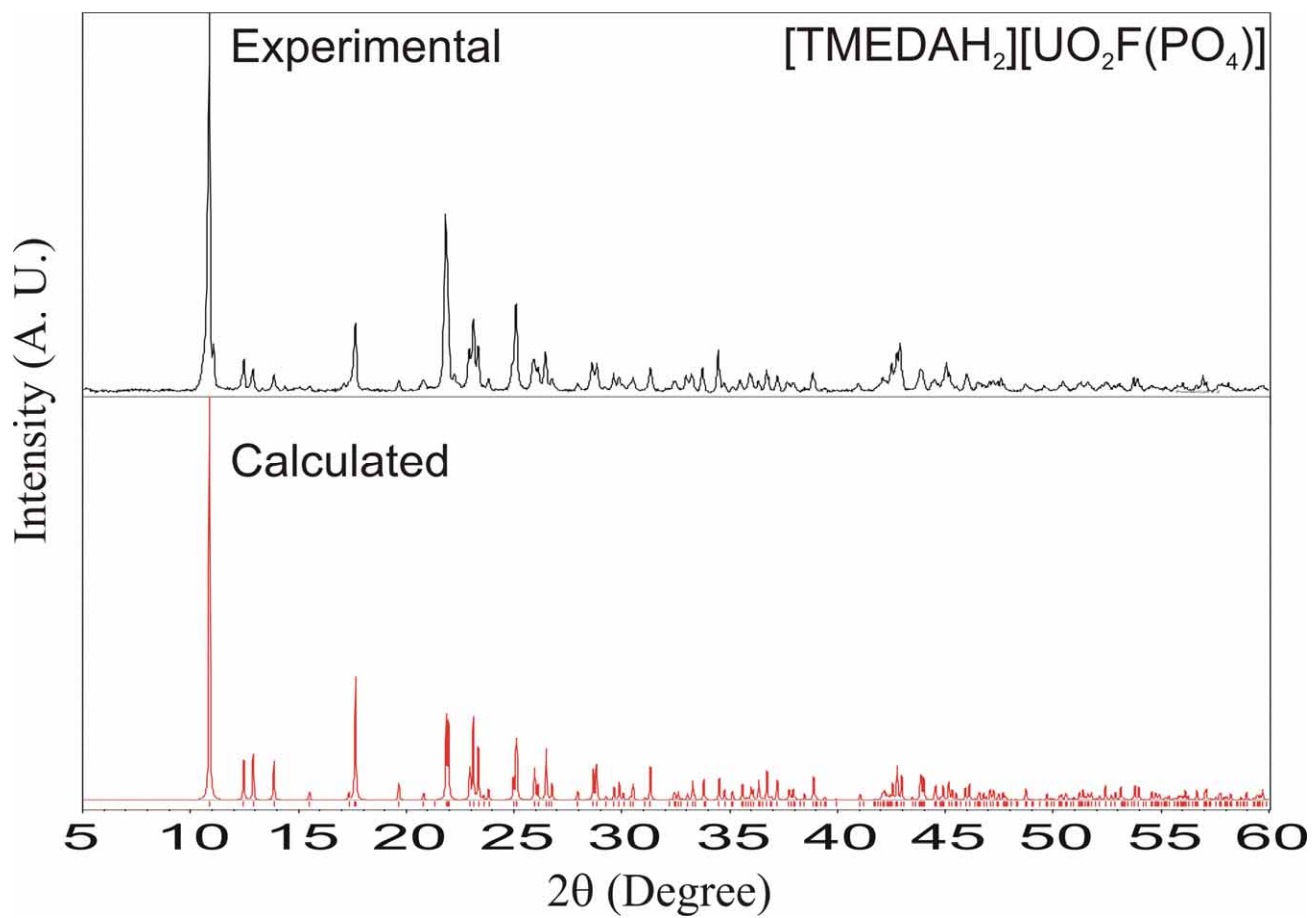

S2. Thermogravimetric analysis diagram for  $[(\text{CH}_3)_2\text{NH}(\text{CH}_2)_2\text{NH}(\text{CH}_3)_2][\text{UO}_2\text{F}(\text{PO}_4)]$

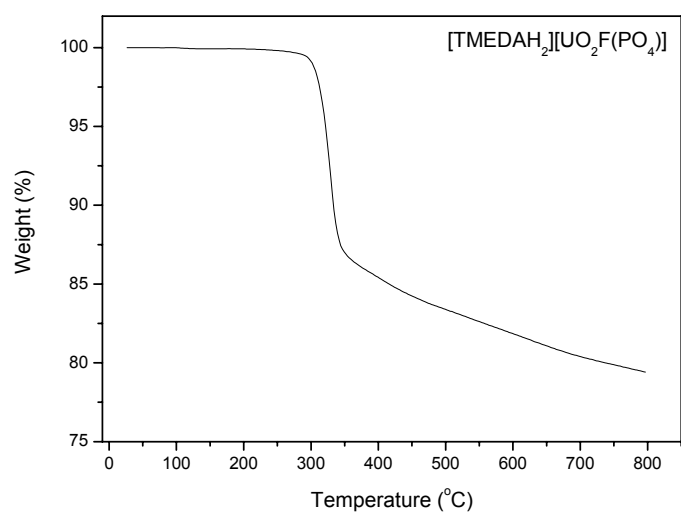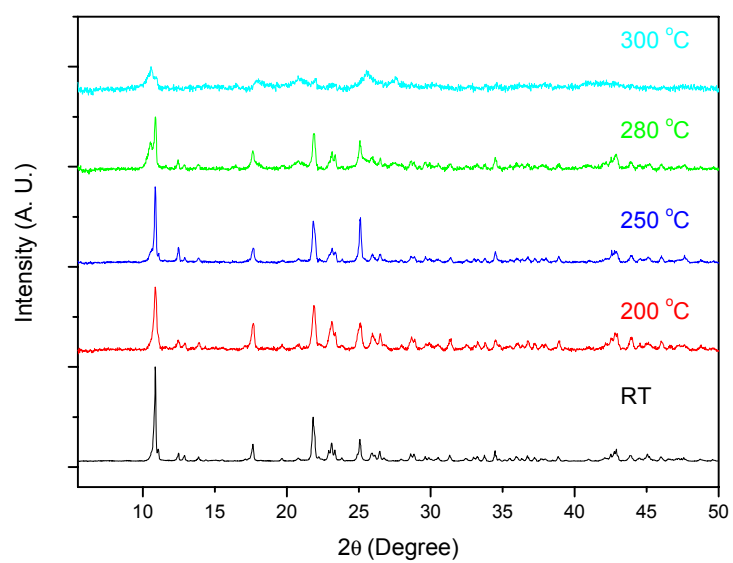

S3. IR and Raman vibrations ( $\text{cm}^{-1}$ ) for  $[(\text{CH}_3)_2\text{NH}(\text{CH}_2)_2\text{NH}(\text{CH}_3)_2][(\text{UO}_2)_2\text{F}_2(\text{HPO}_4)_2]$

|                         | IR                       | Raman                |
|-------------------------|--------------------------|----------------------|
| $\delta(\text{U-F})$    |                          | 184<br>197<br>218    |
| $\rho(\text{U-O})$      |                          | 275                  |
| $\nu_s(\text{U-F})$     | 409<br>430<br>447<br>464 | 455                  |
| $\nu_s(\text{U=O})$     | 851                      | 841                  |
| $\nu_{as}(\text{U=O})$  | 885<br>906               | 916                  |
| $\delta(\text{C-C-N})$  | 479                      |                      |
| $\nu_{as}(\text{C-N})$  | 1039                     | 1047                 |
| $\nu(\text{P-O})$       | 1039                     | 1058                 |
| $\delta(\text{P-OH})$   | 2550<br>2610<br>2687     | 2550                 |
| $\delta(\text{CH}_2)$   | 791<br>1348<br>1460      | 1453<br>1471<br>1487 |
| $\nu(\text{CH}_2)$      | 2919<br>2953             | 2971                 |
| $\delta(\text{CH}_3)$   | 993                      | 1006                 |
| $\nu_s(\text{CH}_3)$    | 2979                     | 2984                 |
| $\nu_{as}(\text{CH}_3)$ | 3022<br>2048             | 3008<br>3038         |
| $\nu(\text{N-H})$       | 3325                     | 3051<br>3356         |
